# Supplementary material for: Seagrass structural and elemental indicators reveal high nutrient availability within a tropical lagoon in Panama
Source: PeerJ. 2021 May 6;9:e11308. doi: 10.7717/peerj.11308 (PMC8106914; doi:10.7717/peerj.11308)
Supplement: Supplemental Information 2 [file peerj-09-11308-s002.xlsx]

## Sheet: All data
			Site info								Visual percent cover					Nutrient content								Shoot morphometrics			Areal Biomass (dry mass / m2)
Date	new Site ID	Depth (m)	GPS N	GPS W	Comments	% thalassia	% syring	% sand	% coral	% soft coral	% sponge	% fleshy algae	% calcareous algae	%N (dry weight)	%C (dry weight)	%P (dry weight)	C:N	C:P	N:P	LI	Log LI		avg shoot area (mm2)	avg leaf length (mm)	avg leaf width (mm)		Areal biomass (g/m2)	Log biomass
2015-03-31	1	3.6	9° 24.049'N	82° 19.275'W	Rhiz 21 / Rhiz 51	88.89	0	10.1	0	0	0	0	0.51	2.09221	36.1187	0.179166	20.1407	520.783	25.8573	4.14274	0.617288		10384.3	243.182	11.6364		134.766	2.12958
2015-03-31	2	1	9° 22.388'N	82° 17.709'W	Rhiz 22 / Rhiz 34	45.36	0	44.33	3.09	0	5.15	1.03	0	2.1988	41.0301	0.23275	21.7702	455.4	20.9185	9.08152	0.958159		656	41	8		70.0696	1.84553
2015-03-31	3	1.2	9° 20.951'N	82° 15.722'W	Rhiz 45 / 53	67.89	0	25.61	0.41	0	0.41	0.81	4.88	2.07312	37.5029	0.219268	21.1051	441.846	20.9355	9.06455	0.957346		3593	101.8	10.4		125.062	2.09712
2015-04-03	4	5.8	9° 21.104'N	82° 15.513'W		26.1	0	73.9	0	0	0	0	0	2.38316	38.4231	0.19425	18.8099	510.989	27.166	2.83399	0.452398						38.8727	1.58965
2015-04-04	5	1.8	9° 20.674'N	82° 14.331'W	adjacent to town, strong current	72.4	0	27.6	0	0	0	0	0	2.53193	42.177	0.205067	19.4344	531.325	27.3394	2.66059	0.424979		8428	256.111	11.1111		73.4141	1.86578
2015-04-04	6	2.7	9° 19.534'N	82° 13.150'W		21.31	0	46.31	0	0	5.33	0	26.64	1.88415	38.2354	0.164521	23.6755	600.378	25.3587	4.64134	0.666643						80.1579	1.90395
2015-04-04	7	2.7	9° 18.466'N	82° 11.890'W		48.57	0	50.61	0	0	0	0	0.82	2.36449	37.5925	0.158675	18.5485	612.032	32.9962	2.99621	0.476573						47.6452	1.67802
2015-04-04	8	2.7	9° 16.314'N	82° 11.824'W		31.84	0.41	45.31	0	4.08	8.16	4.49	4.91	2.05443	39.6844	0.173524	22.5359	590.799	26.2159	3.78414	0.577967		2916	107	9		25.111	1.39986
2015-04-04	9	4.6	9° 14.500'N	82° 10.188'W		30.12	0	55.02	0.4	0	9.64	0.4	4.42	1.95411	39.5457	0.15465	23.61	660.585	27.979	2.02101	0.305568						139.591	2.14486
2015-04-04	11	3.4	9° 13.919'N	82° 15.474'W		91.57	0	8.43	0	0	0	0	0	2.08437	41.0276	0.163081	22.964	649.911	28.3013	1.6987	0.230116						100.17	2.00074
2015-04-04	12	2.1	9° 16.581'N	82° 14.880'W		70.83	0	29.17	0	0	0	0	0	2.38584	38.6252	0.18767	18.8876	531.686	28.1501	1.84994	0.267158		8678	212.6	12.1		81.8576	1.91306
2015-04-04	13	1.8	9° 16.437'N	82° 17.747'W	heavy epiphyte loading	10.22	0	86.56	0	0	1.08	1.61	0.54	2.30445	41.6385	0.166258	21.0802	646.982	30.6914	0.691444	-0.160243						32.5676	1.51279
2015-04-04	14	0.5	9° 14.401'N	82° 17.676'W		81.78	0	18.22	0	0	0	0	0	2.36615	40.9682	0.206491	20.2	512.537	25.3731	4.62686	0.665287						127.693	2.10617
2015-04-04	15	1	9° 14.526'N	82° 20.626'W		57.2	0	42.8	0	0	0	0	0	2.39494	40.183	0.198456	19.5747	523.068	26.7217	3.27834	0.515654						26.3721	1.42114
2015-04-01	16	2.7	9° 15.480'N	82° 23.038'W		86.4	0	13.6	0	0	0	0	0	1.76309	35.7687	0.178313	23.6687	518.205	21.8941	8.10595	0.908804		10637.3	279.556	12.6667		127.255	2.10467
2015-03-31	17	5.8	9° 17.424'N	82° 19.426'W	high urchin abundance, sparse grass	5.2	0	94.8	0	0	0	0	0	2.33654	39.1817	0.208636	19.5639	485.147	24.798	5.20197	0.716168		7589.33	232	10.6667		24.7821	1.39414
2015-03-31	18	1.7	9° 18.335'N	82° 20.829'W	dense seagrass no urchins	65.29	0	34.71	0	0	0	0	0	2.57415	39.9266	0.229408	18.0957	449.609	24.8462	5.1538	0.712127		7296	304	12		33.8286	1.52928
2015-03-31	19	1.6	9° 19.493'N	82° 22.247'W		90.78	0	9.22	0	0	0	0	0	2.01547	39.4368	0.17387	22.8282	585.946	25.6676	4.3324	0.636728		7356	191.778	12.8889		73.4689	1.8661
2015-03-31	20	3	9° 23.995'N	82° 21.044'W	used bags from JEC02	27.02	0	72.98	0	0	0	0	0	2.1033	41.7051	0.191696	23.1331	562.026	24.2953	5.70469	0.756232		1929.33	173.667	11.3333		31.8	1.50243
2015-04-03	21	1.4	9°21.144'N	82°15.500W	GPS on top of third transect	31.84	0.41	45.31		4.08	8.16	4.49	4.91	2.11975	35.9221	0.187247	19.7708	495.597	25.0672	4.93285	0.693098		4090.2	161	9.69231		111.3	2.0465
2015-04-02	22	1	9°13.913'N	82°06.883W	Site ESE of GPS coordinates	56.79	4.77	40.16	0	0	0.08	0.16	0.57	1.99042	34.5364	0.190584	20.2432	468.135	23.1256	6.87444	0.837237		4832	179.308	10.5		40.4627	1.60706
2015-04-01	23	1.6	9° 17.453'N	82° 20.580'W	Site NE of GPS coordinates	10.22		86.56			1.08	1.61	0.54	2.27668	34.237	0.194633	17.5445	454.422	25.9011	4.09889	0.612666		15689.6	264.5	14.2		89.4896	1.95177
2015-04-04	10 deep	8.8	9° 14.918'N	82° 13.386'W		21.72	0	59.84	0	0	0.82	1.64	15.98	2.29677	37.7139	0.179612	19.1571	542.434	28.3151	1.68493	0.226583		5140.67	182.5	8.4		25.2755	1.4027
2015-04-04	10 shallow	1.8	9° 14.918'N	82° 13.386'W	seagrass wall	45.71	0	35.1	0	0	2.45	0	16.33	2.23198	39.2033	0.188169	20.4917	538.213	26.2649	3.73515	0.572307		3109.33	106.556	9.88889		59.3234	1.77323
